# Supplementary material for: High mobility group box 1, ATP, lipid mediators, and tissue factor are elevated in COVID‐19 patients: HMGB1 as a biomarker of worst prognosis
Source: PubMed Central journal article supplement — Clin Transl Sci. 2023 Jan 24;16(4):631–46. doi: 10.1111/cts.13475 (PMC10087071; doi:10.1111/cts.13475), 2023-01-24
Supplement: CTS-16-631-s001.pdf [file CTS-16-631-s001.pdf]

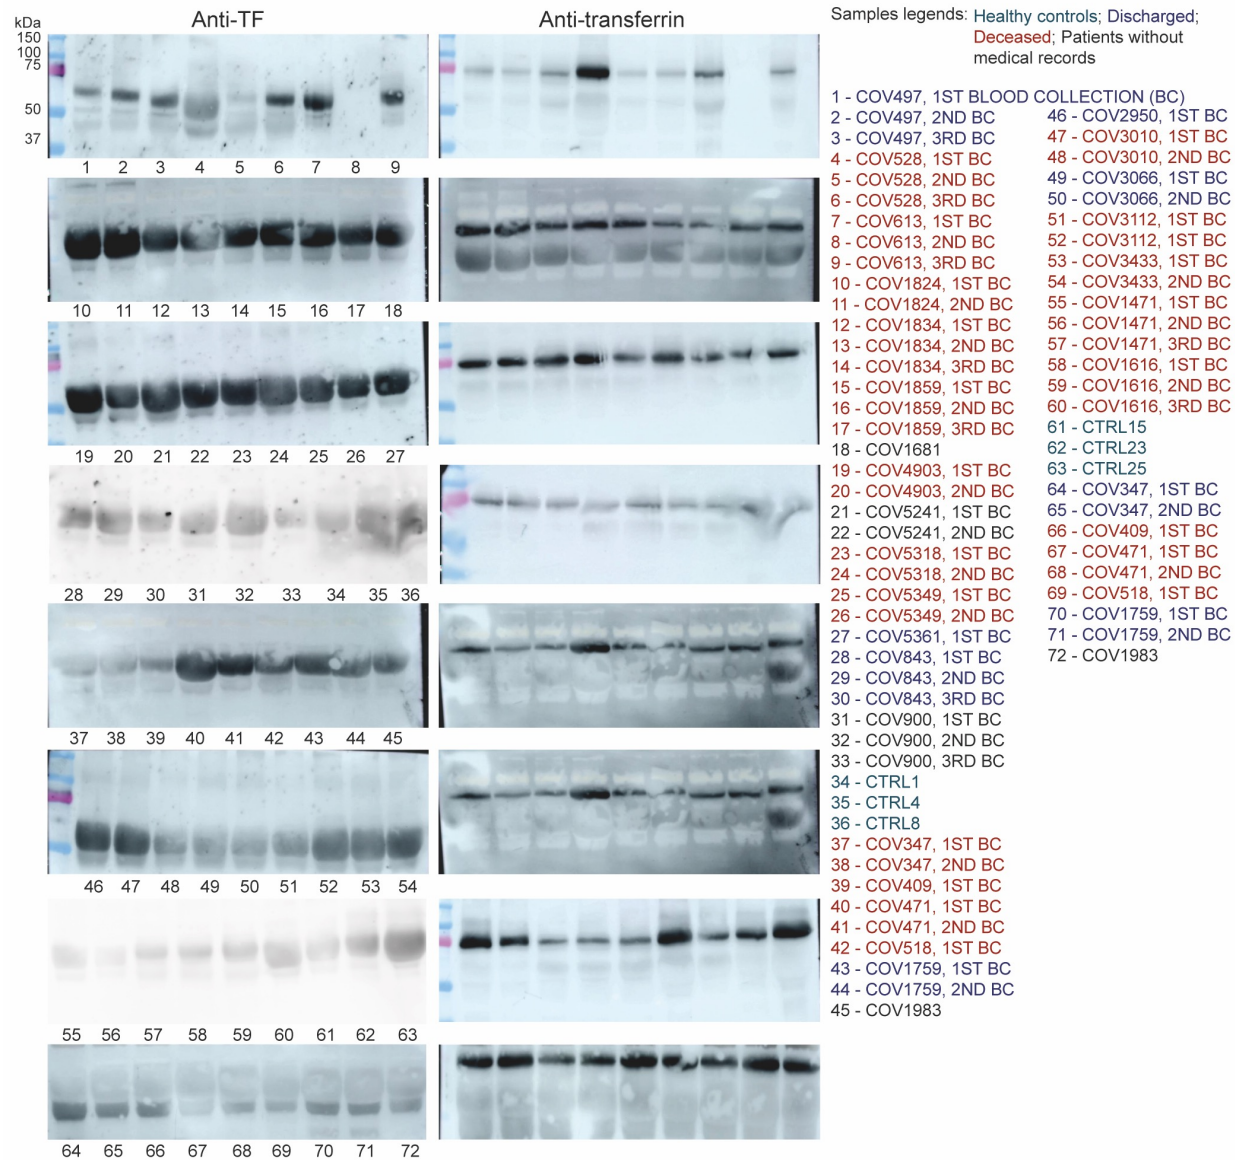

**Figure S1.** Uncut gels. Representative western blot for tissue factor and ferritin of serum samples of the subjects obtained from COVID-19 patients and HC. The samples were run blindly. The graphs in the Figures 3-5 (position C) were obtained after the densitometry analysis of the western blot. In blue: discharged patients; in red: deceased patients; in green: healthy controls; and in black: patients without medical records and excluded to the cohort.

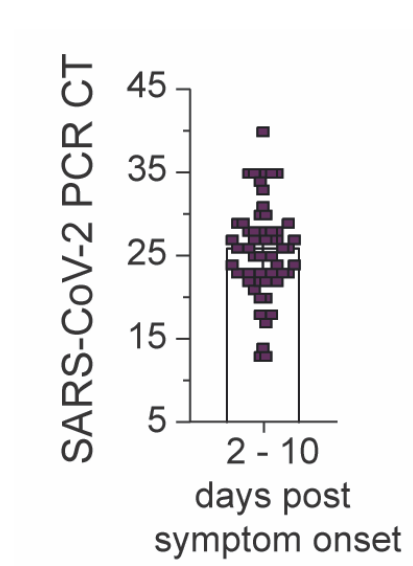

**Figure S2.** SARS-CoV-2 PCR cycle threshold (CT) of nasopharyngeal swab after symptom onset of patients' admission in MDNH.

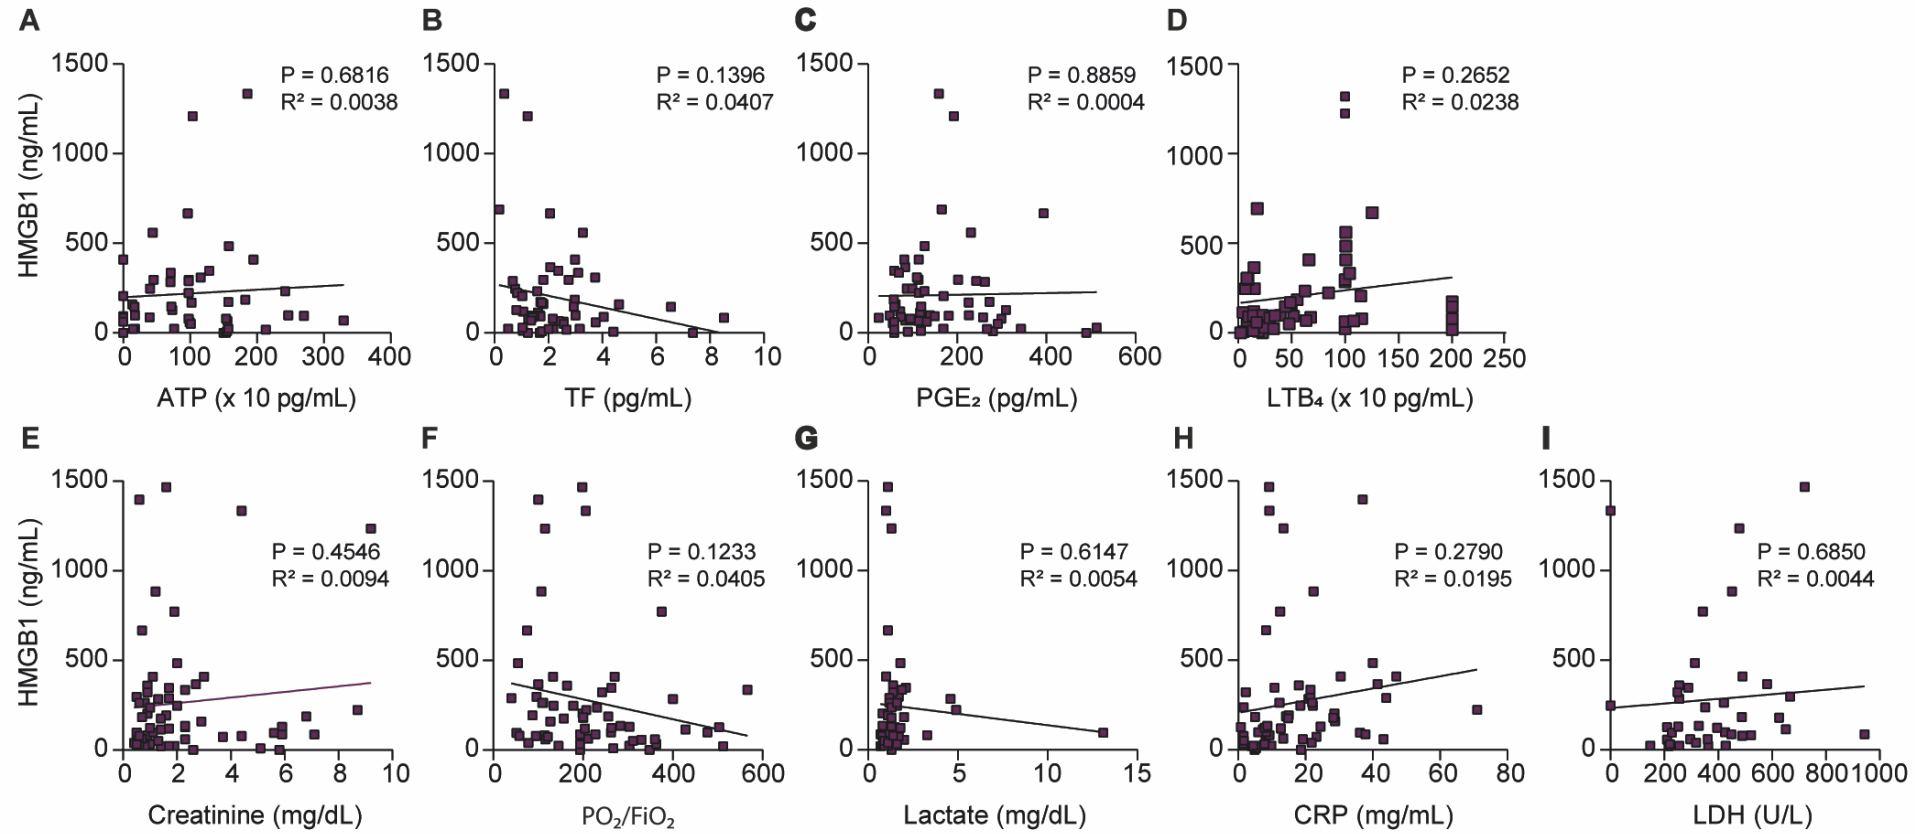

**Figure S3.** Spearman's correlation analyses between inflammatory mediators and tissue injury biomarkers with HMGB1. (A-I) Spearman's correlation analyses between HMGB1 serum levels versus ATP, TF, PGE<sub>2</sub>, LTB<sub>4</sub>, creatinine, PO<sub>2</sub>/FiO<sub>2</sub>, lactate, CRP, and LDH levels. We plotted the highest value obtained for HMGB1 after analysis of two or three samples received from each COVID-19 patient. The values for ATP, TF, PGE<sub>2</sub>, LTB<sub>4</sub>, creatinine, PO<sub>2</sub>/FiO<sub>2</sub>, lactate, CRP, and LDH were paired exactly with the same sample chosen for analysis of HMGB1. No correlations were detected with the analyzed parameters.
